# Supplementary material for: Aquaporin-4-dependent glymphatic solute transport in the rodent brain
Source: eLife journal article supplement (doi:10.7554/elife.40070), 2018-12-18
Supplement: supp [file elife-40070-supp-v1.zip]

Archive with 10 entries (10 files):
- elife_poa_e40070_Figure_3_source_data_1.xlsx
- elife_poa_e40070_Transparent_Reporting_File.pdf
- elife_poa_e40070_Supplementary_File_1.xlsx
- elife_poa_e40070_Supplementary_File_2.xlsx
- elife_poa_e40070_Figure_4_source_data_1.xlsx
- elife_poa_e40070_Supplementary_File_3.xlsx
- elife_poa_e40070_Figure_6_source_data_1.xlsx
- elife_poa_e40070_Figure_5_source_data_1.xlsx
- elife_poa_e40070_Figure_7_source_data_1.xlsx
- elife_poa_e40070_Figure_2_source_data_1.xlsx
