# Supplementary material for: Aquaporin-4-dependent glymphatic solute transport in the rodent brain
Source: eLife journal article supplement (doi:10.7554/elife.40070), 2018-12-18
Supplement: supp [file elife-40070-supp-v1.zip › elife_poa_e40070_Figure_2_source_data_1.xlsx]

## Sheet:  Figure 2b and 2c
	Dorsal									ventral
	WT				AQP4-/-					WT				AQP4-/-
	0	0	0	0	0	0	0	0		0	0	0	0	0	0	0	0
	0	0	0	0	0	0	0	0		0	0	0	0	0	0	0	0
	0	0	0	0	0	0	0	0		0	0	0	0	0	0	0	0
	0	0	0	0	0	0	0	0		0	0	0	0	0	0	0	0
	0	0	0	0	0	0	0	0		0	0	0	0	0	0	0	0
	0	0	0	0	0	0	0	0		0	0	0	0	0	0	0	0
	0	0	0	0	0	0	0	0		0	0	0	0	0	0	0	0
	0	0	0	0	0	0	0	0		0	0	0	0	0	0	0	0
	0	0	0	0	0	0	0	0		0	0	0	0	0	0	0	0
	0	0	0	0	0	0	0	0		0	0	0	0	0	0	0	0
	0	0	0	0	0	0	0	0		0	0	0	0	0	0	0	0
	0	0	0	0	0	0	0	0		0	0	0	0	0	0	0	0
	0	0	0	0	0	0	0	0		0	0	0	0	0	0	0	0
	0	0	0	0	0	0	0	0		0	0	0	0	0	0	0	0
	0	0	0	0	0	0	0	0		0	0	0	0	0	0	0	0
	0	0	0	0	0	0	0	0		0	0	0	0	0	0	0	0
	0	0	0	0	0	0	0	0		0	0	0	0	0	0	0	0
	0	0	0	0	0	0	0	0		0	0	0	0	0	0	0	0
	0	0	0	0	0	0	0	0		0	0	0	0	0	0	0	0
	0	0	0	0	0	0	0	0		0	0	0	0	0	0	0	0
	0	0	0	0	0	0	0	0		0	0	0	0	0	0	0	0
	0	0	0	0	0	0	0	0		0	0	0	0	0	0	0	0
	0	0	0	0	0	0	0	0		0	0	0	0	0	0	0	0
	0	0	0.0012	0	0	0	0	0		0	0	0	0	0	0	0	0
	0	0	0.0017	0	0	0	0	0		0	0	0	0	0	0	0	0
	0	0	0.0017	0	0	0	0	0		0	0	0	0	0	0	0	0
	0	0	0.0017	0	0	0	0	0		0	0	0	0	0	0	0	0
	0	0	0.0029	0.0036	0	0	0	0.0017		0	0	0	0	0	0	0	0
	0	0	0.0033	0.0036	0	0	0	0.0034		0	0	0	0	0	0	0	0
	0	0	0.0038	0.0034	0	0	0	0.0045		0	0	0	0	0	0	0	0
	0	0	0.0049	0.0035	0	0	0	0.0051		0	0	0	0	0	0	0	0
	0	0	0.0065	0.0035	0	0	0	0.006		0	0	0	0	0	0	0	0
	0	0	0.0069	0.0051	0	0	0	0.0069		0	0	0	0	0	0	0	0
	0	0	0.0069	0.0069	0	0.0003	0	0.0069		0	0	0	0	0	0	0	0
	0	0	0.0069	0.0086	0	0	0.0001	0.0057		0	0	0	0	0	0	0	0
	0	0	0.0065	0.0103	0	0	0.0016	0.0056		0	0	0	0	0	0	0	0
	0	0	0.0068	0.0115	0	0	0.0028	0.0051		0	0	0	0	0	0	0	0
	0	0	0.008	0.0114	0	0	0.0033	0.0054		0	0	0	0	0	0	0	0
	0	0.0017	0.0086	0.0106	0	0	0.0047	0.0069		0	0	0	0	0	0	0	0
	0	0.0017	0.0086	0.0095	0	0	0.0057	0.0086		0	0	0	0	0	0	0	0
	0	0.0034	0.0099	0.0103	0	0	0.0066	0.0103		0	0	0	0	0	0	0	0
	0.0009	0.0051	0.0116	0.0121	0	0	0.0069	0.0102		0	0	0	0	0	0	0	0
	0.0017	0.0052	0.0121	0.0127	0	0.0018	0.0082	0.0103		0	0	0	0	0	0	0	0
	0.0034	0.0069	0.013	0.0127	0	0.0034	0.0099	0.0103		0	0	0	0	0	0	0	0
	0.0042	0.0069	0.0132	0.0138	0	0.0034	0.01	0.0117		0	0	0	0	0	0	0	0
	0.0059	0.0051	0.013	0.0156	0	0.0034	0.01	0.0121		0	0	0	0	0	0	0	0
	0.0077	0.0053	0.0129	0.0171	0	0.0051	0.0104	0.0121		0	0	0	0	0	0	0	0
	0.0086	0.0069	0.0135	0.0174	0.0001	0.0051	0.0116	0.0121		0	0	0	0	0	0	0	0
	0.0103	0.0086	0.0151	0.0157	0.0013	0.0051	0.0121	0.0121		0	0.0098	0	0	0	0	0	0
	0.0103	0.0103	0.0169	0.0156	0.0029	0.0051	0.0122	0.0121		0	0.0216	0	0	0	0	0	0
	0.0121	0.0106	0.0171	0.0156	0.0034	0.0051	0.0136	0.0138		0	0.0302	0	0	0	0	0	0
	0.0121	0.0121	0.0172	0.019	0.0046	0.0069	0.0142	0.0156		0	0.0333	0	0	0	0	0	0
	0.0138	0.0124	0.0174	0.0207	0.0051	0.0086	0.013	0.0156		0	0.0343	0	0	0	0	0	0
	0.0146	0.0135	0.0186	0.0209	0.0046	0.0092	0.0126	0.0169		0	0.0399	0	0	0	0	0	0
	0.0163	0.0138	0.019	0.0227	0.0045	0.0103	0.0115	0.0156		0	0.0516	0	0	0	0	0	0
	0.0163	0.0138	0.0178	0.0232	0.0058	0.0103	0.0118	0.0138		0	0.0686	0	0	0	0	0	0
	0.0174	0.0138	0.0174	0.0233	0.0068	0.0111	0.0145	0.0121		0	0.0886	0	0	0	0	0	0
	0.0174	0.0156	0.0166	0.0227	0.0069	0.0121	0.0168	0.0121		0	0.1142	0	0	0	0	0	0
	0.018	0.0174	0.0158	0.0227	0.0081	0.0103	0.0162	0.0139		0	0.1401	0	0.0066	0	0	0	0
	0.0192	0.0192	0.0156	0.0245	0.0086	0.0103	0.0156	0.0156		0	0.1549	0	0.0187	0	0	0	0
	0.0192	0.0192	0.0156	0.0245	0.0098	0.0103	0.0156	0.0156		0	0.1541	0	0.0348	0	0	0	0
	0.0192	0.0197	0.0168	0.0263	0.0115	0.0103	0.0156	0.0156		0	0.1466	0	0.0539	0	0	0	0
	0.0203	0.0209	0.0177	0.0263	0.0133	0.0121	0.0168	0.0174		0	0.1344	0	0.0765	0	0	0	0
	0.0203	0.0221	0.019	0.0263	0.015	0.0121	0.0186	0.0174		0	0.1242	0	0.1009	0	0	0	0
	0.0209	0.0227	0.0196	0.0281	0.0168	0.0138	0.0192	0.0167		0	0.1142	0	0.116	0	0	0	0
	0.0227	0.0227	0.0205	0.03	0.0174	0.0138	0.0192	0.0174		0	0.1027	0.0001	0.1136	0	0	0	0
	0.0233	0.0238	0.0221	0.0315	0.0174	0.0138	0.0192	0.0192		0	0.0926	0.0015	0.1096	0	0	0	0
	0.0233	0.0256	0.0227	0.0316	0.0174	0.0138	0.0192	0.0192		0	0.0875	0.004	0.1077	0	0	0	0
	0.0227	0.0253	0.0227	0.0298	0.0171	0.0156	0.0192	0.0202		0	0.0895	0.006	0.1056	0	0	0	0
	0.0245	0.0253	0.0239	0.0281	0.0161	0.0156	0.0192	0.0192		0	0.0936	0.0196	0.1026	0	0	0	0
	0.0263	0.0254	0.0245	0.0281	0.0166	0.0156	0.0192	0.0192		0	0.0978	0.0415	0.1033	0	0	0	0
	0.0276	0.0245	0.0245	0.0298	0.0184	0.0156	0.0197	0.0178		0	0.0955	0.0447	0.1082	0	0	0	0
	0.0295	0.0245	0.0245	0.0315	0.0192	0.0156	0.0201	0.0192		0	0.0891	0.0384	0.1123	0	0	0	0.0015
	0.03	0.0236	0.0257	0.0318	0.018	0.0174	0.0202	0.0192		0	0.0915	0.0275	0.1101	0	0	0.0056	0.0036
	0.0313	0.0245	0.0263	0.0318	0.0176	0.0174	0.0207	0.0174		0	0.0991	0.0135	0.1061	0	0	0.0151	0.0093
	0.0295	0.0263	0.0252	0.0318	0.0187	0.0174	0.0217	0.0174		0	0.1054	0.0193	0.1005	0	0	0.0255	0.0086
	0.0277	0.0263	0.0256	0.0324	0.0195	0.0173	0.0223	0.0156		0	0.1133	0.038	0.0985	0	0	0.0388	0.0113
	0.0263	0.0263	0.0263	0.0336	0.0205	0.0173	0.0225	0.0156		0	0.1167	0.0444	0.1075	0	0	0.0503	0.0192
	0.0263	0.0263	0.0263	0.0344	0.0209	0.0174	0.0226	0.0174		0.0001	0.1174	0.0447	0.1237	0	0	0.058	0.0237
	0.0263	0.0263	0.0263	0.0327	0.0209	0.0174	0.0227	0.0187		0.0005	0.1182	0.0368	0.1362	0	0.0017	0.0615	0.0263
	0.0281	0.0263	0.0263	0.0328	0.022	0.0192	0.0216	0.0192		0	0.1145	0.0293	0.1436	0.0038	0.0042	0.063	0.03
	0.0281	0.0281	0.0274	0.0329	0.0227	0.0192	0.022	0.0192		0	0.1094	0.0267	0.1447	0.0109	0.0022	0.0621	0.03
	0.03	0.0281	0.0281	0.0336	0.0229	0.0206	0.0227	0.0174		0	0.1037	0.0227	0.1405	0.0178	0	0.059	0.03
	0.03	0.0293	0.0271	0.0342	0.0228	0.0205	0.0238	0.0174		0.0138	0.1029	0.0227	0.1363	0.0239	0.0012	0.0596	0.0227
	0.03	0.0294	0.0274	0.0355	0.0227	0.0209	0.0235	0.0174		0.0336	0.1091	0.0258	0.1338	0.0256	0.0038	0.0617	0.0179
	0.0315	0.0294	0.0303	0.0359	0.0227	0.0209	0.0227	0.0181		0.0495	0.1179	0.0288	0.1417	0.0241	0.0069	0.0646	0.0121
	0.0318	0.0294	0.0307	0.0355	0.0218	0.0197	0.0221	0.0198		0.0611	0.1225	0.037	0.1531	0.022	0.0081	0.0659	0.0121
	0.0318	0.03	0.0294	0.0336	0.0211	0.0198	0.0218	0.0192		0.0675	0.1279	0.0424	0.1556	0.025	0.0121	0.0687	0.0248
	0.03	0.03	0.0289	0.0335	0.0209	0.0198	0.023	0.0174		0.072	0.1385	0.0451	0.1584	0.0311	0.0155	0.075	0.0318
	0.03	0.0295	0.0305	0.0354	0.0213	0.0199	0.0238	0.0174		0.0727	0.153	0.0448	0.1712	0.0373	0.0158	0.0824	0.0394
	0.03	0.0295	0.031	0.0356	0.0218	0.0209	0.0233	0.0209		0.0725	0.1724	0.0449	0.1918	0.0412	0.0089	0.0901	0.0393
	0.0315	0.0295	0.0285	0.0338	0.0224	0.0209	0.0227	0.0211		0.0857	0.1857	0.0486	0.2043	0.0434	0.0081	0.0928	0.0282
	0.0318	0.0296	0.0268	0.0336	0.0227	0.0192	0.0217	0.0227		0.1127	0.1874	0.0531	0.2162	0.0498	0.0121	0.0884	0.0192
	0.0318	0.0281	0.0275	0.0336	0.0227	0.0174	0.0209	0.0227		0.1347	0.1848	0.0557	0.2363	0.0632	0.0156	0.0787	0.0173
	0.0318	0.0285	0.0271	0.0341	0.0227	0.0174	0.0219	0.0209		0.1468	0.1813	0.0523	0.263	0.0779	0.0121	0.0693	0.0192
	0.0318	0.0303	0.0253	0.0355	0.0227	0.0174	0.0227	0.0209		0.1514	0.181	0.0503	0.2936	0.0942	0.0086	0.0612	0.031
	0.0318	0.0303	0.0255	0.0355	0.0227	0.0192	0.0226	0.0192		0.1571	0.1907	0.0563	0.3176	0.0962	0.0086	0.0546	0.0459
	0.0301	0.0315	0.0273	0.0373	0.0228	0.0192	0.0216	0.0174		0.163	0.2023	0.0676	0.3289	0.098	0.0103	0.0515	0.0613
	0.03	0.0318	0.0288	0.0355	0.0229	0.0192	0.0204	0.0192		0.1782	0.2095	0.0873	0.3236	0.096	0.0123	0.0566	0.0749
	0.03	0.032	0.0302	0.0345	0.0229	0.0186	0.0201	0.0192		0.1857	0.2149	0.1104	0.3165	0.0968	0.0198	0.0599	0.0824
	0.03	0.0336	0.03	0.0346	0.022	0.0192	0.02	0.0192		0.1771	0.218	0.1315	0.3053	0.1009	0.0422	0.0573	0.0852
	0.03	0.0336	0.0276	0.0355	0.0215	0.0192	0.0195	0.0192		0.1646	0.2224	0.1456	0.2932	0.1074	0.0604	0.052	0.0832
	0.0318	0.0336	0.0263	0.0355	0.0217	0.0196	0.0187	0.0201		0.1437	0.2293	0.1501	0.2862	0.1065	0.0617	0.0527	0.0836
	0.0318	0.0337	0.0273	0.0355	0.0218	0.0209	0.0182	0.0209		0.1327	0.2375	0.1433	0.2901	0.1027	0.0654	0.0579	0.0894
	0.0318	0.0336	0.0281	0.0355	0.0219	0.0195	0.0181	0.0198		0.134	0.246	0.1368	0.3066	0.1006	0.0753	0.0635	0.0909
	0.0318	0.0318	0.0272	0.0373	0.0221	0.0194	0.0171	0.0197		0.1303	0.2487	0.1331	0.3167	0.0955	0.0858	0.066	0.084
	0.0318	0.0336	0.0263	0.0373	0.0222	0.0209	0.0161	0.0196		0.1252	0.2411	0.1316	0.3212	0.0867	0.0947	0.0647	0.0823
	0.0318	0.0336	0.0263	0.039	0.0224	0.0209	0.016	0.0192		0.1349	0.2259	0.1334	0.3241	0.0741	0.1037	0.0621	0.0926
	0.0318	0.0336	0.0263	0.0373	0.0225	0.0208	0.0166	0.0192		0.1663	0.2054	0.1413	0.3227	0.061	0.1129	0.057	0.1056
	0.0336	0.0336	0.0261	0.0373	0.0227	0.0209	0.0174	0.0208		0.192	0.1866	0.1583	0.3318	0.0513	0.1186	0.0531	0.1145
	0.0336	0.0318	0.026	0.0373	0.0227	0.0192	0.0165	0.0209		0.1988	0.1732	0.1823	0.3552	0.0457	0.1256	0.0522	0.1191
	0.0336	0.03	0.0259	0.0375	0.0227	0.0192	0.0156	0.0208		0.2125	0.1653	0.1989	0.3784	0.0465	0.1251	0.0545	0.1156
	0.0318	0.03	0.0257	0.0392	0.0229	0.0174	0.0147	0.0192		0.2537	0.1636	0.1954	0.394	0.0521	0.1137	0.0598	0.1121
	0.0318	0.03	0.0256	0.0392	0.0239	0.0174	0.0138	0.0192		0.2939	0.1615	0.1974	0.4139	0.0713	0.0969	0.0663	0.1203
	0.03	0.03	0.0259	0.0392	0.0245	0.0174	0.0147	0.0192		0.3222	0.152	0.212	0.4268	0.0895	0.0816	0.0726	0.1229
	0.0318	0.03	0.0262	0.0386	0.024	0.0174	0.0156	0.0192		0.3249	0.1426	0.2224	0.4321	0.1075	0.0693	0.0784	0.1301
	0.0318	0.0302	0.0256	0.0392	0.0228	0.0174	0.0165	0.0174		0.3065	0.1388	0.223	0.4355	0.1215	0.0706	0.0824	0.1306
	0.0318	0.0321	0.0257	0.0403	0.0215	0.0174	0.0174	0.0174		0.3042	0.1427	0.2139	0.4409	0.123	0.0725	0.0849	0.1172
	0.0318	0.0336	0.0261	0.0402	0.0209	0.0192	0.0182	0.0166		0.328	0.1594	0.1928	0.4518	0.131	0.0701	0.0901	0.1088
	0.0318	0.034	0.026	0.0401	0.0209	0.0192	0.0187	0.0156		0.3509	0.1818	0.168	0.4623	0.1483	0.0672	0.0964	0.1169
	0.0301	0.0336	0.0262	0.04	0.0209	0.0209	0.0172	0.0156		0.3573	0.2029	0.1507	0.4615	0.1657	0.0639	0.0999	0.1167
	0.0318	0.0322	0.0263	0.0392	0.0209	0.0209	0.0159	0.0156		0.3524	0.2222	0.1468	0.4663	0.1808	0.0635	0.1044	0.1077
	0.0319	0.0322	0.0263	0.0392	0.0217	0.0192	0.015	0.0156		0.3471	0.2395	0.1524	0.4871	0.1941	0.0809	0.1107	0.099
	0.0336	0.0336	0.0271	0.0397	0.0235	0.0192	0.0148	0.0156		0.3616	0.2599	0.1586	0.5224	0.2036	0.1022	0.1149	0.0906
	0.0336	0.0336	0.0281	0.0392	0.0246	0.0192	0.0157	0.0138		0.4081	0.2921	0.1601	0.5559	0.2127	0.1232	0.1176	0.0907
	0.0338	0.0336	0.0281	0.0373	0.0255	0.0192	0.0165	0.0138		0.4606	0.3318	0.1591	0.5649	0.2174	0.1413	0.1171	0.1036
	0.0357	0.0336	0.0281	0.0373	0.0263	0.0174	0.0174	0.0138		0.4953	0.3661	0.1666	0.5547	0.2211	0.1654	0.105	0.113
	0.0373	0.0336	0.0274	0.0392	0.0263	0.0174	0.0181	0.0138		0.5089	0.3926	0.1864	0.5499	0.2265	0.1864	0.0891	0.1181
	0.0376	0.0336	0.0263	0.0392	0.0263	0.0174	0.0189	0.0138		0.5082	0.4127	0.2196	0.5604	0.2312	0.1864	0.0809	0.1261
	0.0378	0.0355	0.0274	0.0392	0.0267	0.0174	0.0188	0.0138		0.5029	0.4236	0.2577	0.5677	0.235	0.1932	0.0739	0.1373
	0.0379	0.0355	0.0301	0.0374	0.0275	0.0192	0.0181	0.0138		0.4923	0.4226	0.2923	0.5677	0.2358	0.2098	0.0599	0.1445
	0.0376	0.0373	0.0326	0.0373	0.0281	0.0192	0.0174	0.0142		0.481	0.4174	0.3266	0.5677	0.2335	0.2213	0.0431	0.1623
	0.0376	0.0373	0.033	0.0373	0.0287	0.0192	0.0181	0.0156		0.468	0.4082	0.3575	0.5677	0.2285	0.2299	0.0337	0.1787
	0.0392	0.0373	0.0313	0.0369	0.0297	0.0192	0.0192	0.0156		0.4586	0.4048	0.3721	0.5677	0.2206	0.2378	0.0311	0.1723
	0.0392	0.0355	0.03	0.0373	0.0298	0.0192	0.0199	0.0156		0.4616	0.4212	0.3698	0.5677	0.2206	0.2477	0.0366	0.1628
	0.0407	0.0347	0.0292	0.0392	0.03	0.0192	0.0209	0.0156		0.4744	0.4383	0.3606	0.5677	0.222	0.2437	0.046	0.1488
	0.0411	0.0347	0.0282	0.0392	0.03	0.0174	0.0205	0.0156		0.5041	0.4465	0.3501	0.5677	0.238	0.219	0.0537	0.1443
	0.0429	0.0355	0.029	0.0392	0.03	0.0174	0.0197	0.0156		0.5387	0.4488	0.3473	0.5677	0.2604	0.2149	0.0603	0.1614
	0.0433	0.0355	0.0308	0.04	0.03	0.0174	0.0196	0.0156		0.5569	0.4424	0.3488	0.5665	0.2774	0.2629	0.0611	0.1735
	0.0433	0.0355	0.0335	0.0411	0.03	0.0177	0.0195	0.0156		0.5663	0.436	0.3527	0.5624	0.2928	0.3017	0.0628	0.182
	0.0452	0.0355	0.0357	0.0411	0.0307	0.0194	0.02	0.0161		0.5677	0.4374	0.3498	0.5639	0.2988	0.3163	0.0753	0.1856
	0.0433	0.0355	0.0363	0.0399	0.0321	0.0209	0.021	0.016		0.5677	0.4389	0.3436	0.5654	0.3002	0.3165	0.0953	0.184
	0.0429	0.0355	0.0368	0.0411	0.0331	0.0227	0.0209	0.0159		0.5677	0.4397	0.3362	0.5677	0.2961	0.2857	0.1113	0.1774
	0.0444	0.0355	0.0377	0.0435	0.0341	0.0227	0.0216	0.0176		0.5677	0.4472	0.3296	0.5677	0.297	0.2691	0.1234	0.1795
	0.0448	0.0373	0.0392	0.0448	0.0352	0.0227	0.0235	0.0175		0.5677	0.4639	0.327	0.5677	0.3046	0.2774	0.1383	0.1812
	0.0462	0.0392	0.0405	0.0448	0.0348	0.0227	0.0256	0.0192		0.5677	0.4771	0.3331	0.5677	0.3144	0.283	0.1514	0.199
	0.0462	0.0411	0.0408	0.0448	0.0336	0.021	0.0268	0.0208		0.5677	0.4775	0.3418	0.5677	0.3208	0.309	0.1535	0.2155
	0.0481	0.0429	0.0416	0.0448	0.0336	0.021	0.0274	0.0225		0.5677	0.4628	0.3529	0.5677	0.3227	0.3267	0.1487	0.219
	0.0481	0.0429	0.0428	0.0448	0.0337	0.0211	0.0281	0.0227		0.5677	0.4411	0.3565	0.5677	0.3133	0.3458	0.1515	0.2167
	0.0481	0.0448	0.0429	0.0448	0.0344	0.0211	0.0281	0.0245		0.5677	0.4201	0.3578	0.5677	0.3054	0.3724	0.1592	0.2111
	0.0462	0.0467	0.0429	0.0448	0.0355	0.0227	0.0281	0.0245		0.5677	0.4038	0.363	0.5677	0.2933	0.3869	0.1589	0.2055
	0.0448	0.0467	0.0423	0.0467	0.035	0.0227	0.0278	0.0245		0.5677	0.3926	0.3739	0.5677	0.2767	0.3995	0.1573	0.1941
	0.0442	0.0486	0.0406	0.0486	0.0341	0.0213	0.0261	0.0245		0.5669	0.385	0.3959	0.5677	0.2601	0.3859	0.159	0.1837
	0.0429	0.0486	0.0396	0.0505	0.033	0.0213	0.0239	0.0255		0.5618	0.3774	0.4109	0.5409	0.2395	0.3766	0.165	0.176
	0.0429	0.0486	0.0388	0.0519	0.0318	0.0227	0.0221	0.0263		0.5189	0.3737	0.3959	0.4887	0.2161	0.3756	0.1792	0.1724
	0.0417	0.0467	0.0385	0.0505	0.0312	0.0232	0.0209	0.0271		0.4682	0.3721	0.3614	0.4523	0.1795	0.3799	0.198	0.171
	0.0398	0.0467	0.0392	0.0505	0.0294	0.0245	0.0203	0.027		0.4007	0.3802	0.3416	0.4101	0.1317	0.3734	0.206	0.171
	0.0398	0.0467	0.0398	0.0513	0.0275	0.0251	0.0186	0.0269		0.3255	0.39	0.3361	0.3754	0.084	0.3754	0.2051	0.1688
	0.0398	0.0467	0.0405	0.0514	0.0262	0.0263	0.0168	0.0263		0.2794	0.4043	0.3387	0.3487	0.0529	0.3638	0.2148	0.1667
	0.038	0.0467	0.039	0.0524	0.0262	0.0271	0.0156	0.0263		0.2472	0.4157	0.354	0.3436	0.0468	0.3521	0.231	0.1698
	0.0373	0.0467	0.0383	0.0516	0.0263	0.0281	0.015	0.0248		0.2247	0.4119	0.3585	0.3264	0.0529	0.3245	0.2436	0.1674
	0.0373	0.0448	0.0371	0.0505	0.0258	0.0263	0.0138	0.0245		0.2108	0.4003	0.3444	0.3024	0.0605	0.2975	0.2494	0.1567
	0.0373	0.0429	0.0367	0.0499	0.0245	0.0236	0.0133	0.0245		0.2043	0.3895	0.3269	0.2778	0.0685	0.2668	0.2414	0.1493
	0.0373	0.0392	0.0343	0.05	0.024	0.0209	0.0119	0.0228		0.2037	0.366	0.3089	0.2627	0.0682	0.2365	0.2253	0.1512
	0.038	0.0355	0.0317	0.0486	0.0227	0.0209	0.0116	0.0211		0.2001	0.3362	0.3133	0.2388	0.058	0.2042	0.2172	0.1394
	0.0373	0.0336	0.0311	0.0486	0.0222	0.0202	0.0121	0.0194		0.1968	0.3081	0.3227	0.2036	0.0442	0.1724	0.213	0.1077
	0.0366	0.0336	0.0308	0.0486	0.0209	0.0192	0.0118	0.0192		0.1873	0.2807	0.3238	0.1713	0.0304	0.1417	0.2	0.0864
	0.0366	0.0318	0.0318	0.0485	0.0212	0.0185	0.011	0.0192		0.1722	0.2551	0.302	0.143	0.0211	0.1204	0.1863	0.0776
	0.0384	0.0318	0.0323	0.0486	0.022	0.0192	0.0109	0.0174		0.1585	0.2314	0.2618	0.1185	0.0143	0.1178	0.1852	0.0645
	0.0384	0.03	0.0339	0.0486	0.0222	0.0179	0.0113	0.0174		0.1455	0.2138	0.2075	0.0963	0.0023	0.1094	0.1934	0.0491
	0.0384	0.0316	0.0345	0.0504	0.0222	0.0174	0.0129	0.0156		0.1367	0.2034	0.1631	0.0799	0	0.0915	0.1972	0.0314
	0.0384	0.0318	0.0343	0.052	0.0218	0.0161	0.0145	0.0156		0.13	0.195	0.1302	0.069	0	0.0703	0.1976	0.0168
	0.0384	0.0318	0.0342	0.0521	0.0203	0.0174	0.0156	0.0156		0.1184	0.1841	0.1163	0.0661	0	0.0574	0.1913	0.0069
	0.0383	0.0336	0.0339	0.0539	0.0187	0.0174	0.0156	0.0163		0.106	0.1733	0.1208	0.0753	0	0.0448	0.1728	0.0003
	0.0383	0.0336	0.0336	0.0538	0.0175	0.0171	0.0152	0.0156		0.0888	0.157	0.1242	0.0887	0	0.027	0.1498	0.0003
	0.0373	0.0336	0.0341	0.0524	0.0175	0.0171	0.014	0.0149		0.0727	0.1444	0.1253	0.0975	0	0.0129	0.1204	0.0043
	0.0355	0.0336	0.0354	0.0524	0.0182	0.0174	0.0138	0.016		0.056	0.1299	0.1236	0.1048	0	0.006	0.0902	0.0074
	0.0355	0.0318	0.0355	0.0524	0.0192	0.019	0.0138	0.0144		0.0464	0.1155	0.1224	0.1136	0	0.0053	0.0633	0.0025
	0.0364	0.0319	0.035	0.0505	0.0189	0.019	0.0135	0.014		0.0384	0.1064	0.1192	0.1236	0	0.0229	0.0483	0.0013
	0.0345	0.0336	0.0335	0.0505	0.0178	0.0191	0.0126	0.0139		0.0323	0.1021	0.119	0.1376	0	0.0328	0.0486	0.0014
	0.0346	0.0336	0.0328	0.0505	0.0164	0.0174	0.0121	0.0156		0.0302	0.099	0.1176	0.148	0	0.0263	0.0541	0.0009
	0.0327	0.0353	0.0316	0.0505	0.0158	0.0174	0.0121	0.0156		0.0287	0.099	0.1218	0.1558	0	0.0219	0.0626	0
	0.0318	0.0353	0.031	0.0486	0.0147	0.0175	0.0121	0.0172		0.0307	0.0991	0.1155	0.1586	0	0.0182	0.0555	0
	0.03	0.0353	0.0311	0.0486	0.0135	0.0192	0.0121	0.0174		0.0384	0.0983	0.0987	0.1592	0	0.0144	0.0322	0
	0.03	0.0334	0.0318	0.0482	0.0133	0.0192	0.0121	0.0174		0.0482	0.0966	0.0863	0.1609	0	0.0192	0.0175	0
	0.0281	0.03	0.0318	0.0467	0.0121	0.0192	0.0121	0.0174		0.0614	0.0967	0.0833	0.1613	0	0.0172	0.012	0
	0.0272	0.0281	0.0318	0.0467	0.0117	0.0174	0.0118	0.0156		0.0757	0.0982	0.0796	0.1608	0	0.0069	0.0038	0
	0.0263	0.0278	0.0315	0.0467	0.0107	0.0174	0.0105	0.0156		0.0929	0.1024	0.0767	0.1611	0	0.0009	0	0
	0.0253	0.0281	0.0302	0.0449	0.0118	0.0156	0.0107	0.0146		0.1074	0.1076	0.0705	0.1599	0	0.0051	0	0
	0.0235	0.0281	0.0296	0.0448	0.0104	0.0138	0.0117	0.0138		0.1202	0.1107	0.0652	0.1564	0	0.0098	0	0
	0.0235	0.0281	0.0278	0.0431	0.0087	0.0138	0.0099	0.0138		0.1337	0.1028	0.0601	0.1545	0	0.0244	0	0
	0.0217	0.0277	0.0263	0.0432	0.0063	0.0138	0.008	0.0138		0.1415	0.0872	0.0521	0.1681	0	0.0416	0	0
	0.0192	0.0263	0.0263	0.0429	0.0041	0.0121	0.0063	0.0126		0.1465	0.0767	0.0485	0.1867	0	0.0621	0	0
	0.0181	0.0245	0.0264	0.0411	0.0033	0.0103	0.0056	0.0125		0.1494	0.0706	0.0568	0.197	0	0.0832	0	0
	0.0181	0.0232	0.0269	0.0411	0.0026	0.0103	0.0054	0.0121		0.15	0.0697	0.0613	0.1956	0	0.1021	0	0
	0.0163	0.0227	0.0269	0.0411	0.0015	0.0086	0.0038	0.0121		0.1486	0.0726	0.062	0.2049	0	0.1077	0	0
	0.0134	0.0215	0.0261	0.0411	0.0002	0.0069	0.0024	0.0122		0.1422	0.0696	0.0622	0.2213	0	0.0903	0	0
	0.0134	0.0227	0.0251	0.0419	0	0.0051	0.0014	0.0121		0.1302	0.0639	0.063	0.2339	0	0.0772	0	0
	0.0127	0.0227	0.0235	0.042	0	0.0051	0	0.0103		0.1212	0.0606	0.0691	0.2303	0	0.0751	0	0
	0.0127	0.0209	0.0216	0.0421	0	0.0051	0	0.0102		0.1162	0.0613	0.0859	0.2298	0	0.0766	0	0
	0.0145	0.0209	0.0192	0.0421	0	0.0061	0	0.0086		0.1134	0.0758	0.1101	0.2301	0	0.0806	0	0
	0.0145	0.0192	0.0189	0.0429	0	0.0069	0	0.0083		0.1106	0.1065	0.1399	0.231	0	0.0866	0	0
	0.0138	0.0174	0.0174	0.0448	0.0001	0.0051	0	0.0064		0.1034	0.1248	0.1644	0.234	0	0.0898	0	0
	0.0138	0.0156	0.0174	0.0453	0.0008	0.0034	0	0.0046		0.0913	0.1359	0.179	0.2416	0	0.0839	0	0
	0.0138	0.0156	0.0174	0.0452	0.0017	0.0017	0	0.0034		0.0784	0.1485	0.1887	0.2583	0	0.0665	0	0
	0.0138	0.0146	0.0171	0.0451	0.0014	0	0	0.0017		0.065	0.1495	0.1968	0.2461	0	0.0547	0	0
	0.0144	0.0146	0.0156	0.045	0	0	0	0.0009		0.0531	0.1495	0.2029	0.2164	0	0.0715	0	0
	0.0144	0.0156	0.0154	0.0448	0.0004	0	0	0		0.0471	0.1477	0.2073	0.1986	0	0.0772	0	0
	0.0138	0.0156	0.0138	0.0411	0.003	0	0	0		0.0484	0.1555	0.2046	0.1945	0	0.075	0	0
	0.0138	0.0147	0.0141	0.0391	0.0032	0.0003	0	0		0.0546	0.1674	0.1933	0.2122	0	0.0653	0	0
	0.0126	0.0156	0.0156	0.0352	0.0034	0	0	0		0.0597	0.1821	0.1757	0.2595	0	0.0497	0	0
	0.0103	0.0165	0.0158	0.0331	0.0034	0	0	0		0.056	0.1945	0.1484	0.2876	0	0.0316	0	0
	0.0069	0.0174	0.0174	0.0253	0.0032	0	0	0		0.0465	0.2109	0.1186	0.2678	0	0.0225	0	0
	0.0069	0.0174	0.0176	0.0122	0.0017	0	0	0		0.04	0.2194	0.1056	0.2327	0	0.0126	0	0
	0.0069	0.0184	0.0192	0	0.0017	0	0	0		0.0351	0.2091	0.1056	0.1954	0	0.0066	0	0
	0.0069	0.0192	0.0192	0	0.0019	0	0	0		0.0261	0.1799	0.1116	0.1718	0	0.0021	0	0
	0.0056	0.0202	0.0193	0	0.0035	0	0	0		0.0186	0.1549	0.1137	0.1728	0	0.0058	0	0
	0.0038	0.0202	0.0192	0	0.0044	0	0	0		0.0112	0.1368	0.105	0.1757	0	0.0043	0	0
	0.0017	0.0203	0.0189	0	0.0061	0	0	0		0.003	0.1322	0.0938	0.1676	0	0.0017	0	0
	0	0.0192	0.0172	0	0.0061	0	0	0		0	0.1372	0.0867	0.1605	0	0	0	0
	0	0.0192	0.0159	0	0.0051	0	0	0		0	0.1186	0.0803	0.1589	0	0	0	0
	0	0.0209	0.0158	0	0.0046	0.0014	0	0		0	0.0854	0.0837	0.1538	0	0	0	0
	0	0.0209	0.0132	0	0.0031	0	0	0.001		0	0.0684	0.091	0.1435	0	0	0	0
	0	0.0222	0.0136	0	0.0019	0	0	0.0009		0	0.0632	0.0765	0.1263	0	0	0	0
	0	0.0222	0.0145	0	0.0034	0	0	0		0	0.0525	0.0562	0.0929	0	0	0	0
	0	0.0214	0.013	0	0.0033	0	0	0		0	0.0371	0.053	0.0589	0	0	0	0
	0	0.0196	0.0118	0	0.0016	0	0	0		0	0.0278	0.0582	0.0387	0	0	0	0
	0	0.0178	0.0084	0	0	0.0006	0	0		0	0.0216	0.0547	0.023	0	0	0	0
	0	0.0178	0.0049	0	0	0	0	0		0	0.0115	0.0445	0.0065	0	0	0	0
	0	0.0178	0.0016	0	0	0	0	0		0	0	0.0353	0	0	0	0	0
	0	0.0177	0	0	0	0	0	0		0	0	0.0246	0	0	0	0	0
	0	0.0174	0	0	0	0	0	0		0	0	0.0109	0	0	0	0	0
	0	0.0138	0	0	0	0	0	0		0	0	0.0006	0	0	0	0	0
	0	0.0103	0	0	0	0	0	0		0	0	0	0	0	0	0	0
	0	0.0071	0	0	0	0	0	0		0	0	0	0	0	0	0	0
	0	0.0036	0	0	0	0	0	0		0	0	0	0	0	0	0	0
	0	0.0002	0	0	0	0	0	0		0	0	0	0	0	0	0	0
	0	0	0	0	0	0	0	0		0	0	0	0	0	0	0	0
	0	0	0	0	0	0	0	0		0	0	0	0	0	0	0	0
	0	0	0	0	0	0	0	0		0	0	0	0	0	0	0	0

## Sheet: Figure 2e and 2g
Fig. 2b
		Whole sections
		% area of fluorescence
		Section No.
	Mouse No.	1	2	3	4	5	6	7	8	Mean
WT	NO. 1	9.78	9.91	11.33	12.17	13.28	13.42	12.98		12.1817
	NO. 2	10.59	10.46	10.35	11.2	12.34	11.97	11.26		11.2633
	NO. 3	16.23	16.21	16.67	16.78	16.89	17.55	17.92	19.53	17.2225
	NO. 4	15.44	17.56	17.65	17.32	19.01	17.58			17.4267
	NO. 5	8.9	7.12	9.34	11.12	10.23	11.01	11.36		9.86857
KO	NO. 1	3.34	3.37	3.43	3.44	3.68	3.71	3.65		3.51714
	NO. 2	5.75	5.93	5.82	6.59	6.79	7.87	7.66		6.63
	NO. 3	2.5	2.65	2.74	2.87	3.62	3.58	3.79		3.10714
	NO. 4	3.75	4.01	4.22	4.99	4.67	5.02	5.32	5.65	4.70375
	NO. 5	4.85	4.57	4.64	5.04	5.3	5.29			4.94833
	Fig. 2b cont.							Fig. 2c
		WT	KO						Dorsal		Ventral		Lateral
		12.18	3.52						WT	KO	WT	KO	WT	KO
		11.26	6.63					NO. 1	10.78	8.51	41.91	23.83	18.48	13.47
		17.22	3.11					NO. 2	16.31	9.67	38.78	26.1	17.31	14.56
		17.43	4.7					NO. 3	11.29	11.26	57.38	17.22	17.22	13.24
		9.87	4.95					NO. 4	11.27	6.77	54.42	24.54	23.41	14.88
	Mean	13.592	4.582					NO. 5	12.76	12.87	39.92	34.72	23.98	10.9
	SD	4.56	1.78					Mean	12.482	9.816	46.482	25.282	20.08	13.41
								SD	2.26481	2.36734	8.73301	6.27295	3.34333	1.56652

## Sheet: Figure 2i and 2j
	Perivascular space
				Fluroescence intensity (AU)
	Distance to brian surface (μm)		100		200		300		400		500
			WT	KO	WT	KO	WT	KO	WT	KO	WT	KO
	NO. 1		208.55	193.41	206.61	173.56	205.89	113.39	206.22	47.66	198.33	14.33
	NO. 2		196.67	222.56	204.56	192.1	205.23	112.56	201.55	51.01	191.45	22.89
	NO. 3		233.75	195.67	238.54	167.34	234.56	107.5	230.44	37.45	220.56	15.55
	NO. 4		226.01	176.42	227.32	156.67	229.6	76.54	230.87	28.54	222.34	11.44
	NO. 5		180.92	169.24	228.63	152.22	181.54	78.12	176.72	31.14	175.72	9.71
	Mean		209.18	191.46	221.132	168.378	211.364	97.622	209.16	39.16	201.68	14.784
	SD		21.4619	20.668	14.8582	15.7228	21.3756	18.669	22.6002	9.90835	19.8311	5.08498
	Adjacent parenchyma
				Fluroescence intensity (AU)
	Distance to brian surface (μm)		100		200		300		400		500
			WT	KO	WT	KO	WT	KO	WT	KO	WT	KO
	NO. 1		134.29	102.66	134.95	123.76	128.16	70.22	131.2	23.89	118.12	8.01
	NO. 2		129.21	138.23	129.76	132.01	117.34	74.23	127.44	30.11	124.4	10.33
	NO. 3		147.78	107.56	148.45	107.23	135.23	67.67	138.01	27.34	128.78	13.51
	NO. 4		128.54	109.34	128.12	106.67	119.12	47.48	120.23	24.67	105.22	7.54
	NO. 5		107.69	92.82	111.33	92.25	101.69	49.79	104.33	20.1	101.47	6.92
	Mean		129.502	110.122	130.522	112.384	120.308	61.878	124.242	25.222	115.598	9.262
	SD		14.4377	16.9726	13.3763	15.646	12.6607	12.3403	12.8528	3.76471	11.8839	2.70203
