# Supplementary material for: Aquaporin-4-dependent glymphatic solute transport in the rodent brain
Source: eLife journal article supplement (doi:10.7554/elife.40070), 2018-12-18
Supplement: supp [file elife-40070-supp-v1.zip › elife_poa_e40070_Figure_3_source_data_1.xlsx]

## Sheet: Figure 3c and d
Fig.3c		WT					KO
	Distance (um)/Animal #	1	2	3	4		1	2	3	4	5	6	7	8	9
	50	70.484	979.556	134.547	639.701		975.365	207.814	322.064	908.753	125.904	457.273	127.697	146.492	262.083
	100	1023	198.751	1011.76	745.876		462.07	132.969	136.471	255.846	106.001	219.769	73.649	109.529	129.393
	150	923.35	122.516	910.128	311.998		257.815	107.926	106.108	170.519	99.503	151.218	79.237	99.781	104.047
	200	616.761	100.169	807.953	246.389		209.113	101.834	104.095	134.2	100.36	125.766	72.383	108.157	90.852
	250	374.376	92.362	353.472	146.392		166.37	87.843	96.566	113.837	94.803	116.691	72.012	99.605	87.209
	300	267.373	88.468	189.058	134.951		157.887	85.641	88.665	116.6	106.273	107.357	72.825	124.505	92.368
	350	232.55	96.477	152.009	127.986		147.124	90.955	98.638	108.371	102.867	97.483	73.286	115.173	79.566
	400	214.651	97.569	124.846	132.631		183.181	90.737	94.362	112.288	110.57	109.669	77.555	116.453	89.596
	450	203.324	93.743	131.574	124.278		162.782	94.217	93.769	117.515	115.36	104.319	82.954	114.069	91.386
	500	189.602	93.653	140.02	135.114		157.333	88.886	100.663	116.807	105.148	99.309	83.889	115.423	90.408
Fig.3d	Distance (mm)/Animal #	1	2	3	4		1	2	3	4	5	6	7	8	9
	2.5	220.498	143.68	285.839	232.808		175.164	101.138	146.22	138.506	152.088	153.13	106.631	161.842	154.105
	1.5	282.928	104.179	213.315	243.261		213.14	131.723	158.77	132.075	140.244	99.56	176.944	173.998	191.381
	0.5	346.115	207.688	151.503	285.308		185.42	178.588	180.04	165.722	115.699	121.949	135.033	135.859	156.09
	0	299.36	150.391	289.788	212.447		234.964	99.5095	117.52	173.013	109.806	134.196	81.4061	118.605	106.962
	-0.5	275.562	102.405	131.647	141.293		212.733	129.886	100.434	150.961	127.434	144.26	93.4011	110.734	138.21
