# Supplementary material for: Aquaporin-4-dependent glymphatic solute transport in the rodent brain
Source: eLife journal article supplement (doi:10.7554/elife.40070), 2018-12-18
Supplement: supp [file elife-40070-supp-v1.zip › elife_poa_e40070_Figure_4_source_data_1.xlsx]

## Sheet: Figure 4b, 4d, 4f
Figure 4b
WT	Aqp4+/+	Aqp4-/-
6.4825	7.3635	4.146
5.78817	6.1635	5.2115
5.88733	5.11133	2.5085
	4.743	3.41983
	5.22833	4.75767
	5.2245	4.2725
	4.69183
Figure 4d
Dist. Bregma	WT			Aqp4+/+							Aqp4-/-
1.2	6.948	6.938	7.539	4.886	9.065	7.436	4.934	6.402	4.931	4.187	3.485	3.478	3.693	4.373	2.931	2.377
0.6	6.007	5.381	6.553	5.573	8.625	5.726	4.602	4.987	4.907	4.149	3.583	3.069	3.961	3.849	3.052	2.349
0	5.081	6.278	6.358	6.479	7.027	6.445	4.223	5.632	4.424	5.326	4.132	4.623	4.282	5.187	3.934	2.439
-0.6	5.208	5.336	6.275	4.42	5.409	5.339	4.452	5.294	5.495	4.008	3.827	3.924	3.33	4.722	3.232	2.352
-1.2	5.657	4.238	5.949	3.841	5.78	5.414	3.954	4.458	5.784	4.829	4.691	4.599	5.006	4.515	3.639	2.548
-1.8	6.423	6.558	6.221	5.469	8.275	6.621	5.986	4.574	5.829	5.507	5.158	11.576	5.363	5.9	3.731	2.986
Figure 4f
Region	WT			Aqp4+/+							Aqp4-/-
CPu	2.014	2.42	2.4835	2.868	3.758	2.2205	2.465	2.048	2.043	2.1835	2.122	2.104	3.2135	2.0985	2.0435	2.0395
HT	17.329	13.478	12.183	19.4115	26.854	16.6105	11.713	17.6315	15.6655	13.579	9.1045	6.7765	8.5725	10.9425	6.723	3.6195
BF	12.857	17.767	18.091	8.0795	15.944	15.063	6.6585	13.761	13.479	6.443	7.532	6.724	8.218	8.154	8.05	3.8895
DC	3.548	3.222	4.6425	4.199	3.55	3.4545	2.825	2.719	2.3955	2.926	2.0555	2.119	2.146	2.682	2.0125	2.1065
LC	10.9855	5.814	9.431	3.5345	10.811	5.854	4.9685	4.1365	3.7025	2.991	3.405	2.2215	2.883	2.4035	2.0245	2.134
VC	12.659	11.531	19.22	6.4005	11.8585	10.7735	5.6475	9.207	6.8305	5.313	6.22	5.165	6.2265	6.8505	5.547	2.4855
