# Supplementary material for: Aquaporin-4-dependent glymphatic solute transport in the rodent brain
Source: eLife journal article supplement (doi:10.7554/elife.40070), 2018-12-18
Supplement: supp [file elife-40070-supp-v1.zip › elife_poa_e40070_Figure_5_source_data_1.xlsx]

## Sheet: Figure 5b, 5d, 5e, 5g
Figure 5b
Time (min)	Aqp4-/-							Aqp4+/+
0	1.50555	1.4268	1.54255	1.54723	1.36824	2.5303	1.47036	1.32781	1.41285	1.33317	1.27432	1.31417	1.39518
1	1.54141	1.41317	1.74872	1.58315	1.41002	2.62558	1.57745	1.50584	1.53474	1.48695	1.33898	1.44545	1.46122
2	1.6178	1.46052	2.11586	1.74393	1.60927	2.96573	2.09088	2.41022	1.94158	2.44959	1.60683	2.49598	1.51348
3	1.64845	1.72005	3.01293	2.10798	2.65748	3.56899	3.16678	5.82288	2.77278	4.93088	2.55203	6.61229	1.8493
4	1.88064	2.38963	6.18552	3.15979	6.64455	4.82295	5.28499	13.8143	4.68992	9.34659	4.6602	14.5341	3.04221
5	2.65167	4.14595	16.4983	5.38927	12.524	5.81869	9.0675	25.048	9.12571	14.7644	8.6088	25.1842	5.07009
6	2.85143	5.25128	20.3093	6.05025	12.7854	6.08932	10.2523	29.462	12.4959	15.7825	9.9478	27.0106	5.83132
7	2.94621	5.8642	23.8612	6.43449	12.8826	6.35818	11.3334	33.7993	14.8063	15.7868	10.9632	26.9934	6.35449
8	3.05186	6.22578	27.6052	6.90563	13.628	6.48878	12.5747	37.3458	16.861	16.0611	12.608	26.7074	6.93498
9	3.24955	6.96992	31.5223	7.49619	14.7477	6.62746	13.8289	40.6893	19.3006	16.9185	15.0422	27.5806	7.61631
10	3.52686	7.90715	35.1959	8.2515	16.2914	6.97073	15.45	44.2681	21.8896	17.8831	17.9648	29.351	8.45157
11	3.79251	8.77169	38.4725	9.16871	18.5298	7.64936	17.1357	47.2152	24.96	19.5342	21.0652	31.0394	9.61602
12	4.16858	10.0583	41.2924	10.3317	21.28	8.61439	19.0523	50.2907	28.0581	21.226	24.8867	33.2693	11.0513
13	4.64285	11.5187	43.6913	11.9978	24.4632	9.87394	20.9072	53.0149	31.7541	23.1361	29.1017	35.9372	12.8437
14	5.14006	13.2301	45.6934	14.1252	28.0486	11.4123	23.2366	56.5508	35.7296	25.3579	33.9713	38.5392	14.8595
15	5.72846	15.4979	47.3606	16.5161	31.6001	13.1897	25.5649	59.5866	40.0423	27.3088	38.8107	41.3727	16.987
16	6.36484	18.2191	48.6632	19.2409	35.872	15.4762	27.6615	62.5186	44.4703	29.6329	43.7299	43.974	19.6692
17	7.07798	21.3388	49.6421	22.1161	40.1024	17.8635	30.5231	64.9546	49.2392	32.3747	49.375	47.0157	22.4431
18	7.91444	24.6388	50.3325	25.1648	45.0265	20.8238	33.0173	68.3508	54.1084	35.1226	54.7744	49.6825	25.7253
19	8.65323	28.2499	50.8043	28.2938	50.3829	24.0542	36.1711	71.4261	59.2808	38.0981	59.9342	52.2301	29.1754
20	9.63451	32.4862	51.2516	31.6286	56.1834	27.1981	38.8597	75.1894	64.139	40.8847	65.2235	55.4137	33.1317
21	10.5766	36.9252	51.5301	35.0682	61.2418	30.5502	41.7889	77.3066	69.3011	44.0491	70.519	58.524	37.1516
22	11.4892	41.2677	51.4806	38.4847	66.7523	33.8803	44.675	80.0941	74.1683	47.5835	75.8515	61.1914	40.9869
23	12.4207	45.6023	51.4023	42.1416	72.2266	37.1666	47.7496	82.9515	80.1235	50.976	80.3486	64.7215	44.8595
24	13.3827	51.9743	51.1903	45.4609	77.4968	40.6956	50.3999	85.705	85.8937	54.4229	85.8041	67.3165	49.1164
25	14.2674	56.1636	51.0113	48.887	83.1956	44.2851	53.1187	88.5938	91.3285	57.4131	91.2673	70.1422	53.2904
26	15.2867	61.8232	50.8182	52.3868	88.4287	47.7182	56.1435	90.6775	96.574	60.8404	95.5636	73.1648	57.8639
27	16.1064	65.6837	50.5222	55.6877	93.6794	51.7096	58.784	93.2488	101.757	63.8321	99.9161	75.8801	62.0845
28	17.1675	70.9046	50.5514	59.4878	98.9045	55.4721	61.1667	95.6991	107.78	66.4596	105.118	78.4522	66.5583
29	17.8953	76.389	50.3777	63.027	104.123	59.1492	63.1848	98.3219	112.693	70.1921	109.782	81.2224	70.6717
30	18.9337	81.219	50.1188	66.2978	109.386	62.9598	65.3159	101.053	117.337	73.2911	114.308	83.545	75.0364
Figure 5d			Figure 5e			Figure 5g
Aqp4-/-	Aqp4+/+		Aqp4-/-	Aqp4+/+		Aqp4+/+	Aqp4-/-
7.72808	5.68632		3.9921	7.20077		5.65483	2.1605
2.66631	7.14698		3.05023	9.97916		2.543	2.27033
4.48569	6.62391		5.73734	9.04338		4.9295	2.3185
3.77131	8.74177		4.62959	11.4753		3.00367	1.97667
3.98738	6.719		5.776	9.08981		3.1135
3.70891	6.23626		4.49911	7.72808		3.49333
5.58801			5.95532
4.98233			4.83897

## Sheet: Figure 5h and 5i
Figure 5h												Figure 5i
Dist. (µm)	Aqp4-/-				Aqp4+/+							Aqp4-/-	Aqp4+/+
0	1	1	1	1	1	1	1	1	1	1		11.424	28.56
5.712	0.711799	0.965294	0.882269	0.709001	0.897237	0.99178	0.904909	0.959904	0.746892	0.913398		17.136	28.56
11.424	0.414751	0.806009	0.759016	0.385088	0.727131	0.908023	0.761896	0.891984	0.599619	0.796848		17.136	22.848
17.136	0.26675	0.525604	0.554439	0.216623	0.602495	0.790173	0.626474	0.805651	0.606145	0.672119		11.424	45.696
22.848	0.215625	0.273058	0.36006	0.10246	0.539522	0.646725	0.516204	0.739381	0.504063	0.49635			22.848
28.56	0.190569	0.19578	0.217188	0.0438372	0.5006	0.497857	0.438767	0.661062	0.450071	0.320939			22.848
34.272	0.174053	0.158084	0.157229	0.0281093	0.474229	0.353721	0.386386	0.583375	0.417433	0.227495
39.984	0.158637	0.117132	0.145605	0.0240144	0.450808	0.263927	0.3659	0.552757	0.351286	0.192796
45.696	0.149499	0.0838511	0.130987	0.0211087	0.411158	0.216508	0.358204	0.519172	0.311027	0.169835
51.408	0.149396	0.0691137	0.125254	0.0184039	0.386691	0.18661	0.362853	0.474194	0.279201	0.154198
57.12	0.145848	0.061368	0.120631	0.0165435	0.377772	0.187942	0.343913	0.413739	0.227584	0.140862
62.832	0.149071	0.0555494	0.104697	0.0153717	0.343653	0.192415	0.311614	0.384753	0.21371	0.125703
68.544	0.146328	0.051632	0.107182	0.0133891	0.333668	0.182801	0.292983	0.38257	0.207759	0.120253
74.256	0.153766	0.0502288	0.107803	0.0134515	0.342177	0.189278	0.277139	0.361586	0.17203	0.119762
79.968	0.141976	0.0417104	0.10866	0.0126061	0.336393	0.1838	0.282593	0.364426	0.148447	0.115622
85.68	0.14578	0.0395074	0.104571	0.0117111	0.310748	0.1717	0.298632	0.34355	0.14392	0.107225
91.392	0.142728	0.0410487	0.0919678	0.0115587	0.306931	0.170922	0.303222	0.327352	0.131005	0.102569
97.104	0.136974	0.0452263	0.0940349	0.0122395	0.309848	0.167145	0.273465	0.305393	0.122081	0.0996534
102.816	0.133635	0.0437105	0.0972697	0.0119571	0.305911	0.15665	0.246334	0.30617	0.122845	0.0956672
108.528	0.142523	0.0438656	0.0918984	0.0109964	0.294089	0.157981	0.225306	0.301359	0.128507	0.0944432
114.24	0.141708	0.0412559	0.0798689	0.0102323	0.292201	0.16637	0.19891	0.281815	0.124857	0.0894013
119.952	0.139933	0.0402484	0.0778534	0.0107362	0.275686	0.163163	0.173748	0.273557	0.121756	0.0859691
125.664	0.139893	0.0394955	0.0809624	0.0111313	0.297027	0.165059	0.154677	0.247241	0.118085	0.0885674
131.376	0.11719	0.0400382	0.0808643	0.0113179	0.29245	0.160156	0.137027	0.263872	0.113078	0.0832007
137.088	0.119628	0.0404948	0.0810798	0.0115812	0.280329	0.16129	0.126545	0.234228	0.107752	0.0772571
142.8	0.136775	0.0400043	0.0769063	0.011011	0.269109	0.165303	0.117982	0.233174	0.113398	0.0752722
148.512	0.113602	0.03854	0.0793341	0.0110386	0.281701	0.165124	0.112449	0.229385	0.111029	0.0710644
154.224	0.129002	0.0375592	0.0810682	0.0108699	0.292257	0.159871	0.106831	0.236069	0.11161	0.0762264
159.936	0.128714	0.0387668	0.0783945	0.0116551	0.275497	0.157553	0.102666	0.223518	0.113263	0.0663428
165.648	0.131696	0.0370985	0.0756384	0.011641	0.26165	0.161169	0.0958351	0.238932	0.111307	0.063003
171.36	0.135741	0.0371194	0.0745854	0.0104945	0.258911	0.157031	0.0937421	0.242985	0.122604	0.0620583
177.072	0.128556	0.0403265	0.0747252	0.0093491	0.261574	0.145093	0.085822	0.218154	0.119532	0.0585672
182.784	0.13302	0.0380917	0.0767292	0.00979611	0.250765	0.146005	0.0807438	0.222752	0.115076	0.0588199
188.496	0.144477	0.0380344	0.0754919	0.0103726	0.251589	0.160083	0.0722614	0.23035	0.109969	0.0599009
194.208	0.140039	0.0385249	0.0702162	0.0109347	0.251324	0.16306	0.0672932	0.223537	0.114152	0.055233
199.92	0.137105	0.0372032	0.0741411	0.0111588	0.267857	0.161177	0.0622142	0.223675	0.117789	0.0555872
205.632	0.141701	0.0382867	0.0722525	0.00998099	0.257759	0.150185	0.0602911	0.205844	0.115612	0.0544604
211.344	0.136155	0.0397852	0.0724776	0.0105984	0.248215	0.156504	0.0585133	0.2045	0.114444	0.0524537
217.056	0.12894	0.0395331	0.0699745	0.0104338	0.255188	0.177805	0.0560097	0.187322	0.122633	0.0534002
222.768	0.129279	0.0405175	0.0698371	0.0100156	0.236427	0.164715	0.0512457	0.200574	0.126573	0.0525391
228.48	0.144823	0.0401304	0.0684259	0.00997458	0.234457	0.160578	0.0489769	0.208965	0.117241	0.0489982
234.192	0.13095	0.0386782	0.0731346	0.0102122	0.25929	0.15687	0.0499873	0.205834	0.11593	0.04731
239.904	0.124219	0.0391952	0.0714578	0.0105087	0.257062	0.152416	0.0500552	0.210593	0.113603	0.0460959
245.616	0.130307	0.0397717	0.0655252	0.00962309	0.247038	0.164907	0.046988	0.203194	0.115372	0.0466018
251.328	0.132198	0.0410206	0.0654549	0.00973192	0.249313	0.157322	0.0460845	0.196319	0.115601	0.0465709
257.04	0.129892	0.0380385	0.0681001	0.00957283	0.233411	0.155149	0.0431943	0.199539	0.109145	0.0448815
262.752	0.128674	0.0385604	0.0673316	0.00998615	0.237787	0.155671	0.0413446	0.198911	0.11224	0.0451328
268.464	0.135895	0.0404454	0.064421	0.010587	0.250652	0.154388	0.0442153	0.198518	0.115257	0.0423775
274.176	0.132774	0.0396869	0.0668905	0.00981557	0.247462	0.148781	0.0409574	0.202466	0.11212	0.0381053
279.888	0.142615	0.0391292	0.0644109	0.00965566	0.239184	0.15296	0.0379142	0.20318	0.110583	0.038325
285.6	0.135946	0.0390057	0.0662335	0.00970643	0.246363	0.157566	0.0351047	0.197644	0.120549	0.038011
291.312	0.131439	0.0384717	0.0685156	0.00949307	0.262741	0.153173	0.0353723	0.199679	0.119663	0.0385117
297.024	0.1368	0.040047	0.0683538	0.009741	0.255124	0.156467	0.0362552	0.196637	0.111992	0.0389387
302.736	0.134115	0.0375398	0.0686982	0.00937846	0.241214	0.169732	0.0378969	0.191279	0.11197	0.0358612
308.448	0.129624	0.0389811	0.0716524	0.00936399	0.234003	0.161347	0.0373946	0.19574	0.111755	0.035719
314.16	0.140871	0.0372063	0.0678738	0.00973335	0.247489	0.15597	0.0389905	0.19424	0.113634	0.0342213
319.872	0.137021	0.0405361	0.0703359	0.0093762	0.259917	0.154496	0.0366851	0.183465	0.113168	0.0348826
325.584	0.135144	0.0366455	0.0699286	0.00985538	0.254443	0.159208	0.034499	0.181973	0.118841	0.0326585
331.296	0.131621	0.039002	0.072555	0.00921129	0.254851	0.157445	0.0344169	0.204818	0.108961	0.0318323
337.008	0.128118	0.0371258	0.0686397	0.00982216	0.255247	0.154487	0.0336227	0.186126	0.108308	0.0300971
342.72	0.123611	0.0387437	0.0669255	0.00962101	0.265339	0.161577	0.030842	0.191603	0.108903	0.0286827
348.432	0.126216	0.0403408	0.065912	0.00947463	0.249798	0.142566	0.030689	0.200597	0.110452	0.0282298
354.144	0.131056	0.0352942	0.0693009	0.00945675	0.259353	0.161463	0.030937	0.195212	0.115243	0.0309396
359.856	0.134335	0.0375854	0.0715714	0.00944729	0.238047	0.142725	0.0308321	0.194109	0.117177	0.0289348
365.568	0.134443	0.0384358	0.067344	0.00940476	0.244242	0.152661	0.0302607	0.206062	0.108784	0.0286817
371.28	0.134242	0.0372605	0.0663367	0.0103501	0.260054	0.154818	0.0300524	0.208738	0.111292	0.0283343
376.992	0.126165	0.0386345	0.0659243	0.00973955	0.228581	0.156003	0.0301534	0.189491	0.112995	0.0293118
382.704	0.120177	0.0375728	0.0666862	0.00975031	0.245575	0.167889	0.0295887	0.191407	0.113839	0.0273233
388.416	0.124091	0.0386145	0.0691758	0.0101244	0.235236	0.148262	0.0269589	0.212167	0.107407	0.0284758
394.128	0.120593	0.0401129	0.0680742	0.0100219	0.236006	0.143216	0.030439	0.205138	0.101627	0.0268307
399.84	0.119214	0.0385032	0.067329	0.00933821	0.23407	0.128386	0.0277869	0.192421	0.115538	0.0274689
405.552	0.117257	0.0396273	0.0651944	0.00960927	0.245878	0.142112	0.0264178	0.190169	0.113284	0.0271528
411.264	0.116405	0.0384864	0.0657615	0.00962711	0.252206	0.147241	0.0268016	0.205264	0.114805	0.0270909
416.976	0.115451	0.0388786	0.0705083	0.00969387	0.254444	0.14975	0.0255099	0.186327	0.113597	0.0249787
422.688	0.118485	0.0369576	0.0685505	0.0108553	0.253285	0.151206	0.0248316	0.211541	0.1114	0.0233965
428.4	0.118506	0.0371802	0.0664921	0.00972622	0.252821	0.145421	0.0250066	0.169727	0.114958	0.0238913
434.112	0.119874	0.0360007	0.0689843	0.00996636	0.252883	0.148423	0.0249054	0.185174	0.112938	0.0237638
439.824	0.13137	0.0395966	0.0631776	0.0103145	0.256662	0.147803	0.0248839	0.187857	0.12142	0.0225609
445.536	0.116815	0.0401206	0.0625019	0.0100839	0.23299	0.133147	0.0236716	0.194117	0.115357	0.0235008
451.248	0.120923	0.040667	0.0680569	0.00988963	0.247459	0.139699	0.0230539	0.179559	0.116667	0.0237258
456.96	0.117805	0.0389101	0.0688937	0.0103617	0.260203	0.129655	0.0238513	0.189032	0.112989	0.0241513
462.672	0.117297	0.0375629	0.0653232	0.00977184	0.245129	0.139019	0.0226593	0.188238	0.115853	0.0244444
468.384	0.120464	0.0374569	0.063938	0.00983561	0.247317	0.148824	0.0209209	0.18819	0.110997	0.024006
474.096	0.121889	0.0383616	0.0603912	0.0102486	0.249006	0.143068	0.0223432	0.188252	0.110822	0.0232041
479.808	0.12509	0.0381413	0.0647014	0.0104287	0.250676	0.131081	0.0214224	0.194961	0.104212	0.0234115
485.52	0.127403	0.0365151	0.0704206	0.0101016	0.245571	0.135167	0.0220733	0.187117	0.119109	0.0251018
491.232	0.118598	0.0382098	0.0672738	0.00898914	0.242331	0.152205	0.02304	0.188217	0.108839	0.0236758
496.944	0.112605	0.0385887	0.0627171	0.00964762	0.239409	0.134125	0.0205552	0.184596	0.115575	0.0230901
502.656	0.12139	0.0421998	0.0641442	0.0100292	0.237603	0.135798	0.0225968	0.201957	0.116261	0.0235499

## Sheet: Figure 5j and 5k
Figure 5j			Figure 5k
Aqp4+/+	Aqp4-/-		Aqp4+/+	Aqp4-/-
1.672	0.001		0	1.826
1.609	0		0	1.424
0.727	0		0	1.443
0.583	0		0	1.138
1.501			0.323
1.187			0
