# Supplementary material for: Aquaporin-4-dependent glymphatic solute transport in the rodent brain
Source: eLife journal article supplement (doi:10.7554/elife.40070), 2018-12-18
Supplement: supp [file elife-40070-supp-v1.zip › elife_poa_e40070_Figure_6_source_data_1.xlsx]

## Sheet: Figure 6j-n
Region	Timepoint	Genotype	Replicate	Normalized Value
Total	0	WT	1	1
Total	0	WT	2	1
Total	0	WT	3	1
Total	0	WT	4	1
Total	0	WT	5	1
Total	30	WT	1	1.14687
Total	30	WT	2	1.01519
Total	30	WT	3	0.995292
Total	30	WT	4	1.14244
Total	30	WT	5	1.12245
Total	60	WT	1	1.38262
Total	60	WT	2	1.05565
Total	60	WT	3	1.01446
Total	60	WT	4	1.37796
Total	60	WT	5	1.83046
Total	0	Snta1-/-	1	1
Total	0	Snta1-/-	2	1
Total	0	Snta1-/-	3	1
Total	0	Snta1-/-	4	1
Total	0	Snta1-/-	5	1
Total	0	Snta1-/-	6	1
Total	0	Snta1-/-	7	1
Total	30	Snta1-/-	1	0.863704
Total	30	Snta1-/-	2	1.0907
Total	30	Snta1-/-	3	1.12791
Total	30	Snta1-/-	4	1.00773
Total	30	Snta1-/-	5	0.993734
Total	30	Snta1-/-	6	1.01573
Total	30	Snta1-/-	7	1.01255
Total	60	Snta1-/-	1	0.90672
Total	60	Snta1-/-	2	1.24097
Total	60	Snta1-/-	3	1.21663
Total	60	Snta1-/-	4	1.03111
Total	60	Snta1-/-	5	1.01099
Total	60	Snta1-/-	6	1.05322
Total	60	Snta1-/-	7	1.01373
Cortex	0	WT	1	1
Cortex	0	WT	2	1
Cortex	0	WT	3	1
Cortex	0	WT	4	1
Cortex	0	WT	5	1
Cortex	30	WT	1	1.043
Cortex	30	WT	2	0.999598
Cortex	30	WT	3	0.991254
Cortex	30	WT	4	1.08018
Cortex	30	WT	5	1.08138
Cortex	60	WT	1	1.24463
Cortex	60	WT	2	1.03191
Cortex	60	WT	3	1.00413
Cortex	60	WT	4	1.24483
Cortex	60	WT	5	1.31642
Cortex	0	Snta1-/-	1	1
Cortex	0	Snta1-/-	2	1
Cortex	0	Snta1-/-	3	1
Cortex	0	Snta1-/-	4	1
Cortex	0	Snta1-/-	5	1
Cortex	0	Snta1-/-	6	1
Cortex	0	Snta1-/-	7	1
Cortex	30	Snta1-/-	1	0.864934
Cortex	30	Snta1-/-	2	1.02927
Cortex	30	Snta1-/-	3	1.07475
Cortex	30	Snta1-/-	4	1.00063
Cortex	30	Snta1-/-	5	0.984364
Cortex	30	Snta1-/-	6	1.00561
Cortex	30	Snta1-/-	7	0.993229
Cortex	60	Snta1-/-	1	0.883174
Cortex	60	Snta1-/-	2	1.12988
Cortex	60	Snta1-/-	3	1.10064
Cortex	60	Snta1-/-	4	1.01369
Cortex	60	Snta1-/-	5	0.995232
Cortex	60	Snta1-/-	6	1.03156
Cortex	60	Snta1-/-	7	0.981572
Hippocampus	0	WT	1	1
Hippocampus	0	WT	2	1
Hippocampus	0	WT	3	1
Hippocampus	0	WT	4	1
Hippocampus	0	WT	5	1
Hippocampus	30	WT	1	0.997569
Hippocampus	30	WT	2	0.992783
Hippocampus	30	WT	3	0.988174
Hippocampus	30	WT	4	0.98331
Hippocampus	30	WT	5	1.0501
Hippocampus	60	WT	1	1.06651
Hippocampus	60	WT	2	1.00339
Hippocampus	60	WT	3	0.989716
Hippocampus	60	WT	4	1.13648
Hippocampus	60	WT	5	1.22058
Hippocampus	0	Snta1-/-	1	1
Hippocampus	0	Snta1-/-	2	1
Hippocampus	0	Snta1-/-	3	1
Hippocampus	0	Snta1-/-	4	1
Hippocampus	0	Snta1-/-	5	1
Hippocampus	0	Snta1-/-	6	1
Hippocampus	0	Snta1-/-	7	1
Hippocampus	30	Snta1-/-	1	0.894484
Hippocampus	30	Snta1-/-	2	0.944516
Hippocampus	30	Snta1-/-	3	0.908901
Hippocampus	30	Snta1-/-	4	0.985573
Hippocampus	30	Snta1-/-	5	0.975193
Hippocampus	30	Snta1-/-	6	0.990405
Hippocampus	30	Snta1-/-	7	0.930524
Hippocampus	60	Snta1-/-	1	0.913217
Hippocampus	60	Snta1-/-	2	0.966767
Hippocampus	60	Snta1-/-	3	1.00309
Hippocampus	60	Snta1-/-	4	0.994932
Hippocampus	60	Snta1-/-	5	0.978604
Hippocampus	60	Snta1-/-	6	1.0042
Hippocampus	60	Snta1-/-	7	0.890357
Subcortical	0	WT	1	1
Subcortical	0	WT	2	1
Subcortical	0	WT	3	1
Subcortical	0	WT	4	1
Subcortical	0	WT	5	1
Subcortical	30	WT	1	1.31604
Subcortical	30	WT	2	1.04521
Subcortical	30	WT	3	1.00381
Subcortical	30	WT	4	1.2594
Subcortical	30	WT	5	1.18336
Subcortical	60	WT	1	1.62214
Subcortical	60	WT	2	1.10445
Subcortical	60	WT	3	1.03504
Subcortical	60	WT	4	1.59005
Subcortical	60	WT	5	1.7098
Subcortical	0	Snta1-/-	1	1
Subcortical	0	Snta1-/-	2	1
Subcortical	0	Snta1-/-	3	1
Subcortical	0	Snta1-/-	4	1
Subcortical	0	Snta1-/-	5	1
Subcortical	0	Snta1-/-	6	1
Subcortical	0	Snta1-/-	7	1
Subcortical	30	Snta1-/-	1	0.859478
Subcortical	30	Snta1-/-	2	1.19693
Subcortical	30	Snta1-/-	3	1.25198
Subcortical	30	Snta1-/-	4	1.02385
Subcortical	30	Snta1-/-	5	1.00805
Subcortical	30	Snta1-/-	6	1.03592
Subcortical	30	Snta1-/-	7	1.03469
Subcortical	60	Snta1-/-	1	0.930371
Subcortical	60	Snta1-/-	2	1.39628
Subcortical	60	Snta1-/-	3	1.38174
Subcortical	60	Snta1-/-	4	1.06211
Subcortical	60	Snta1-/-	5	1.03338
Subcortical	60	Snta1-/-	6	1.09153
Subcortical	60	Snta1-/-	7	1.05945
3rd Ventricle	0	WT	1	1
3rd Ventricle	0	WT	2	1
3rd Ventricle	0	WT	3	1
3rd Ventricle	0	WT	4	1
3rd Ventricle	0	WT	5	1
3rd Ventricle	30	WT	1	1.61123
3rd Ventricle	30	WT	2	1.06863
3rd Ventricle	30	WT	3	1.00768
3rd Ventricle	30	WT	4	1.41249
3rd Ventricle	30	WT	5	1.28635
3rd Ventricle	60	WT	1	2.34463
3rd Ventricle	60	WT	2	1.16051
3rd Ventricle	60	WT	3	1.05502
3rd Ventricle	60	WT	4	2.00454
3rd Ventricle	60	WT	5	2.12089
3rd Ventricle	0	Snta1-/-	1	1
3rd Ventricle	0	Snta1-/-	2	1
3rd Ventricle	0	Snta1-/-	3	1
3rd Ventricle	0	Snta1-/-	4	1
3rd Ventricle	0	Snta1-/-	5	1
3rd Ventricle	0	Snta1-/-	6	1
3rd Ventricle	0	Snta1-/-	7	1
3rd Ventricle	30	Snta1-/-	1	0.817741
3rd Ventricle	30	Snta1-/-	2	1.25032
3rd Ventricle	30	Snta1-/-	3	1.3746
3rd Ventricle	30	Snta1-/-	4	1.03327
3rd Ventricle	30	Snta1-/-	5	0.99334
3rd Ventricle	30	Snta1-/-	6	1.03165
3rd Ventricle	30	Snta1-/-	7	1.063
3rd Ventricle	60	Snta1-/-	1	0.928174
3rd Ventricle	60	Snta1-/-	2	1.78172
3rd Ventricle	60	Snta1-/-	3	1.72869
3rd Ventricle	60	Snta1-/-	4	1.10583
3rd Ventricle	60	Snta1-/-	5	1.05797
3rd Ventricle	60	Snta1-/-	6	1.13882
3rd Ventricle	60	Snta1-/-	7	1.12556
