# Supplementary material for: Aquaporin-4-dependent glymphatic solute transport in the rodent brain
Source: eLife journal article supplement (doi:10.7554/elife.40070), 2018-12-18
Supplement: supp [file elife-40070-supp-v1.zip › elife_poa_e40070_Figure_7_source_data_1.xlsx]

## Sheet: Figure 7c
Figure 7c
Control	Aβ-Injected	Sham
31.1895	18.0472	15.0232
21.4501	16.9548	13.0204
23.9958	18.3492	16.2923
28.987	13.893	15.3888
32.5338	21.7747	14.7784
19.949	19.3046	19.1879
	17.977
	16.0297
