# Supplementary material for: Aquaporin-4-dependent glymphatic solute transport in the rodent brain
Source: eLife journal article supplement (doi:10.7554/elife.40070), 2018-12-18
Supplement: supp [file elife-40070-supp-v1.zip › elife_poa_e40070_Supplementary_File_1.xlsx]

## Sheet: Supp. Table 1
	Aqp4 KO			Wildtype
Study	Mean	SD	n	Mean	SD	n	Species	KO line	Age (weeks)	Anesthesia type	Tracer	Tracer Type	Tracer size (kDa)	Injection Volume (µl)	Injection Rate (µl/min)	Experiment duration (min)	Detection method
Iliff et al. 2012 (Fig. 4F)	18.4252	3.93701	4–5	35.1181	5.82677	4–5	mouse	UIO	8 – 12	KX	OA-647	protein	45	10	2	30	Fluorescence
Iliff et al. 2012 (Fig. 6C)	6.89858	1.41509	4–6	13.5613	4.71698	4–6	mouse	UIO	8 – 12	KX	125I-b-amyloid (1-40)	peptide	4.5	10	2	30	Radioactivity
Achariyar et al. 2016 (Fig. 6C)	13.5244	2.30655	5	26.361	9.99503	5	mouse	UIO	6 – 8	KX	FITC-apoE3	apolipoprotein	34	5	1	15	Fluorescence
Achariyar et al. 2016 (Supp. Fig. 7D)	8.24701	2.7325	6	19.1235	2.7001	6	mouse	UIO	6 – 8	KX	14C-Inulin	inert	6	5	1	30	Radioactivity
Smith et al. 2017 (Fig. 5C)	53.3333	8.87695	6	46.8571	11.6642	6	mouse	UCSF	12 – 24	Tribromoethanol	OA-647	protein	45	10	1.4 – 2	30	Fluorescence
Smith et al. 2017 (Fig. 5D)	69.0096	18.3907	6	66.4537	17.9994	6	mouse	UCSF	12 – 24	Tribromoethanol	OA-647	protein	45	10	1.4 – 2	30	Fluorescence
Smith et al. 2017 (Fig.5E)	22.9487	8.31359	5	22.4359	5.65267	6	rat	UCSF	N/A	Tribromoethanol	OA-647	protein	45	30	1.4 – 2	30	Fluorescence
Plog et al. 2018 (Fig. 1I)	3	0.84	3	11.34	3.49	8	mouse	UIO	8 – 12	KX	BSA-647	protein	66	10	2	30	Fluorescence
NMU (Fig.2C)	4.61153	1.8797	5	13.3835	4.06015	5	mouse	NMU	20	Chloral hydrate	Texas Red-dextran	dextran	3	10	2	30	Fluorescence
RIKEN (Fig. 3D)	127.778	41.6667	9	237.5	69.4444	4	mouse	RIKEN	10 – 12	KX	BDA	dextran	70	10	1	30	Fluorescence
UNC (Fig. 4B)	4.053	0.9677	6	5.504	0.9522	7	mouse	UCSF	15 – 18	KX	BSA-647	protein	66	10	1	30	Fluorescence
URMC (Fig. 5E)	4.81	1	8	9.1	1.54	6	mouse	UIO	8 – 10	KX	BSA-647	protein	66	10	2	30	Fluorescence
URMC (Fig. 5G)	2.182	0.1517	4	3.79	1.224	6	mouse	UIO	8 – 10	KX	BSA-647	protein	66	5	1	30	Fluorescence
