# Supplementary material for: Aquaporin-4-dependent glymphatic solute transport in the rodent brain
Source: eLife journal article supplement (doi:10.7554/elife.40070), 2018-12-18
Supplement: supp [file elife-40070-supp-v1.zip › elife_poa_e40070_Supplementary_File_2.xlsx]

## Sheet: ISF Flow_Summary
	Aqp4 KO			Wildtype
Study	Mean	SD	n	Mean	SD	n	Species	KO line	Age (weeks)	Anesthesia type	Tracer	Tracer Type	Tracer size (kDa)	Injection Volume (µl)	Injection Rate (µl/min)	Injection Site	Experiment duration (min)	Detection method
Iliff et al. 2012 (Fig. 5A)	92.1754	4.19827	4	73.8548	5.72518	4	mouse	UIO	8 – 12	KX	3H-mannitol	inert	4.5	1	0.017	striatum	60	Radioactivity
Iliff et al. 2012 (Fig. 6A)	59.1667	12.5	4 – 6	27.5	9.16667	4 – 6	mouse	UIO	8 – 12	KX	125I-b-amyloid (1-40)	peptide	0.1822	1	0.017	striatum	60	Radioactivity
Iliff et al. 2014 (Fig. 4K)	38.7255	7.60463	6	27.7778	6.00365	6	mouse	UIO	8 – 12	KX	14C-Inulin	inert	6	0.5	0.1	cortex	60	Radioactivity
Plog et al. 2015 (Fig. 1F)	27.5	3.72678	5	38.6667	2.44949	6	mouse	UIO	8 – 12	KX	3H-dextran	dextran	40	0.5	0.1	cortex	60	Radioactivity
Murlidharan et al. 2016 (Fig. 5D)	60.5482	44.9916	3	10.2782	8.4157	3	mouse	UCSF	0	Hypothermia	Alexa Fluor 488-dextran	dextran	10	3	3*	lateral ventricle	45	Fluorescence
Lundgaard et al. 2017 (Fig. 3A)	28.5519	6.41495	5	38.9344	5.27042	6	mouse	UIO	8 – 12	KX	14C-Inulin	inert	6	0.5	0.1	cortex	60	Radioactivity
Smith et al. 2017 (Fig.5F)	326.923	38.8601	3	350.962	32.0513	4	mouse	UCSF	12 – 24	Tribromoethanol	HiLyte647-β-amyloid (1-40)	peptide	5.3	0.02	5 × 100 ms pulses at 1 Hz and 10 psi.	striatum	N/A	Fluorescence
Teng et al. 2018 (Fig. 2C, Th)	2.36431	0.211896	6	4.10409	0.64684	6	rat	Beijing	N/A	Pentobarbital	Gd-DTPA	inert	0.938	2	0.2	thalamus	240	MRI
Teng et al. 2018 (Fig. 2C, Cn)	2.02974	0.223048	6	2.11896	0.468401	6	rat	Beijing	N/A	Pentobarbital	Gd-DTPA	inert	0.938	2	0.2	striatum	240	MRI
