# Supplementary material for: Aquaporin-4-dependent glymphatic solute transport in the rodent brain
Source: eLife journal article supplement (doi:10.7554/elife.40070), 2018-12-18
Supplement: supp [file elife-40070-supp-v1.zip › elife_poa_e40070_Supplementary_File_3.xlsx]

## Sheet: Sheet1
Group	Brain regions	Analysis method	Microscope	Camera
NMU	Whole brain: +4 to -8 mm from bregma; Anterior-Posterior (A-P) sections: +1.5 to -0.7 mm from bregma; Subregional analysis: dorsal cortex, lateral cortex, ventral cortex.	The mean integrated optical density, thresholded % area, mean fluorescence intensity.	Leica DM4000B digital microscope，Zeiss LSM 880	Azure 8.3 MP high resolution CCD camera , Leica DFC320 digital camera, Axio Examiner. Z1
RIKEN	A-P sections: +2.5 to -0.5 mm from bregma	Mean fluorescence intensity	Olympus BX51	Olympus DP74 digital camera
UNC	A-P sections: +1.2 to -1.8 mm from bregma; Subregional analysis: dorsal cortex, lateral cortex, ventral cortex, basal forebrain, hypothalamus, and caudoputamen.	Mean fluorescence intensity	Olympus MVX10	Hamamastu ORCA-Flash 4.0
URMC	A-P sections: +1.2 to -1.8 mm from bregma	Mean fluorescence intensity	Olympus MVX10	Hamamastu ORCA-Flash 4.0
OHSU	Subregional analysis from a coronal MRI slice at approximately -1.5mm bregma. Subregions include cortex, hippocampus, subcortical regions, the 3rd ventricle and total brain	Normalized T1 enhancement	Bruker-Biospec 11.75 T preclinical MRI scanner	N/A
